# Supplementary material
Source: publisher site journal article supplement (https://www.dovepress.com/article/410151)
Supplement: Supplementary file 1 [file get_supplementary_file.php]

Supplementary Materials:

Supplementary Table 1: Enrollment criteria for association study

| Natural clearance |
| --- |
| No vaccination history |
| Anti-HBs and anti-HBc positive or anti-HBs positive |
| No hepatic disease and hospitalization history |
| Age >40 |
| Naïve to HBV |
| No vaccination history |
| All HBV serum makers negative |
| No hepatic disease and hospitalization history |
| Age >40 |
| Persistent hepatitis B infeciton(CHB) |
| HBsAg and anti-HBc positive(antibody immunoglobulin G) for at least 12 month |
| Hospitalization with two-time higher of ALT, AST, TB upper limit and positive HBV replication |
| No clinical evidence of liver cirrhosis and liver cancer |
| Age >35 |
| Chronic asymptomatic HBV carrier |
| HBsAg and anti-HBc positive(antibody immunoglobulin G) for at least 12 month |
| ALT and AST normal before and in our repeated follow-up |
| No hospitalization history for HBV chronic infection |
| Without evidence of liver cirrhosis and HCC in radiology and body examination |
| Age >35 |
| Liver cirrhosis |
| HBsAg and anti-HBc positive(antibody immunoglobulin G) for at least 12 month |
| Positive in ultrasongraphy/CT imaging or confirmed by pathology |
| Preclude liver cancer |
| Existence of any cirrhotic complication |
| Hepatocellular carcinoma(HCC) |
| HBsAg and anti-HBc positive(antibody immunoglobulin G) for at least 12 month |
| Positive in ultrasongraphy/CT imaging solely or combined AFP>400ng/ml |
| Confirmed by pathology |
| Acute Liver failure |
| HBsAg and anti-HBc positive and excluded other acute liver failure causes |
| INR>1.5, TB 10 time of upper limit of normal level and illness duration <12 weeks with or without encephalopathy |
| No evidence of liver cirrhosis and liver cancer |

Abbreviations: ALT Alanine aminotransferase; AST aspartate aminotransferase; AFP αfetoprotein level; INR International Normalized Ratio; CT computer tomography; TB total bilirubin; HBsAg hepatitis B surface antigen; anti-HBc antibody to hepatitis B core antigen; HBV hepatitis B virus; AFP alpha-fetoprotein.


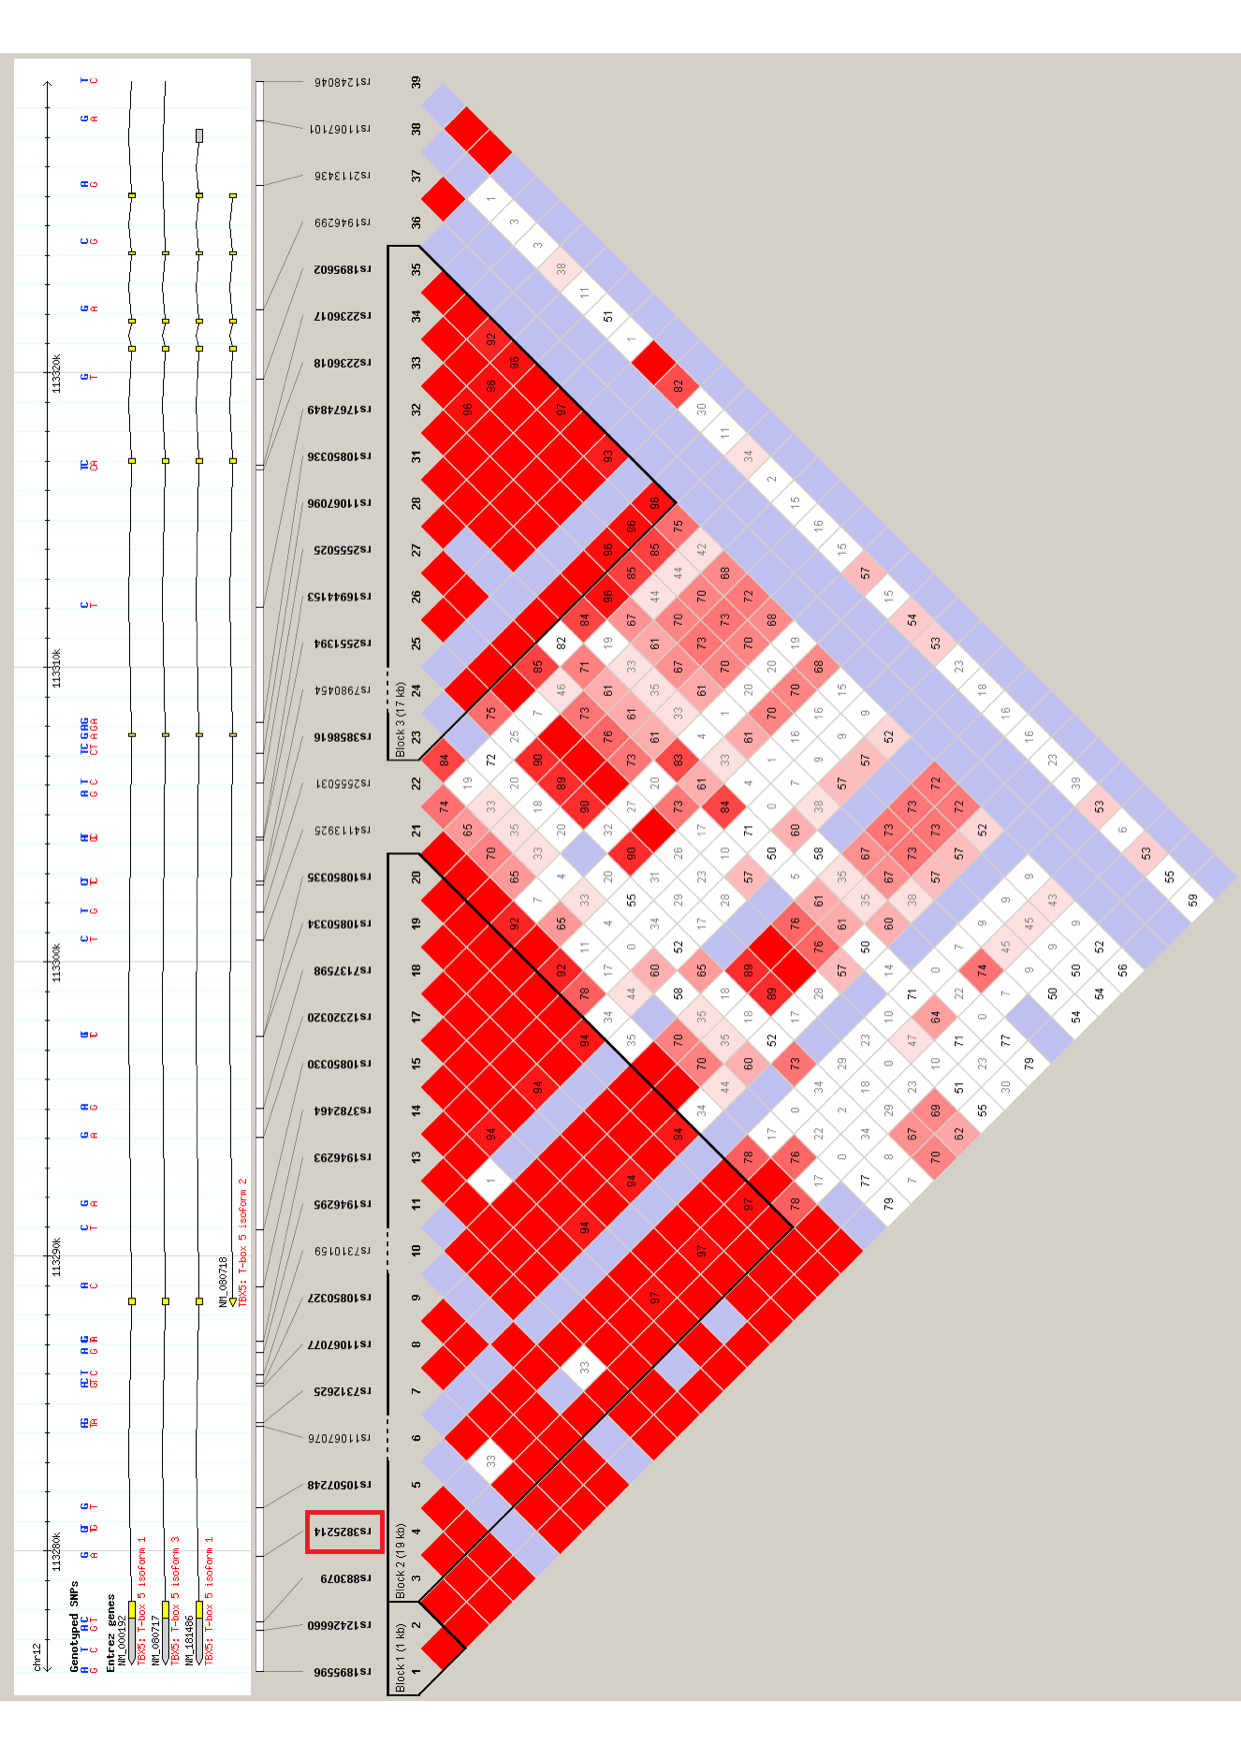


Supplementary Figure 1. TBX5 LD mapping, rs3825214 and TBX5 alterative splicing isoforms
